# Supplementary material for: The HU Regulon Is Composed of Genes Responding to Anaerobiosis, Acid Stress, High Osmolarity and SOS Induction
Source: PLoS One. 2009 Feb 4;4(2):e4367. doi: 10.1371/journal.pone.0004367 (PMC2634741; doi:10.1371/journal.pone.0004367)
Supplement: Table S9 — Comparison of the genes regulated by HU (1) and by DNA supercoiling by Blot et al (2006) (2) and Peter et al (2004) (3) (0.03 MB DOC) [file pone.0004367.s011.doc]

**Supplemental Table S9. Comparison of the genes regulated by HU (1) and by DNA supercoiling by Blot *et al* (2006) (2) and Peter et al (2004) (3)**

| **Gene** | **Blattner** | **Reg.1** | **Reg.2** | **Reg.3** | **Function** |
| --- | --- | --- | --- | --- | --- |
| *nhaA* | b0019 | [Cluster2] | Rel | Rel | Na+/H antiporter; pH dependent |
| *yrbL* | b3207 | [Cluster2] | Hyp | Hyp | orf; hypothetical protein |
